# Supplementary material
Source: publisher site journal article supplement (https://www.dovepress.com/article/474956)
Supplement: Supplementary file 1 [file get_supplementary_file.php]

**Supplement Table 1: Cardiometabolic Risk Factors by BMI Group1**

| **Women (n=151)** | | | | | |
| --- | --- | --- | --- | --- | --- |
| **Parameter** | **Nl Weight**  **20% (30/151)** | **Overweight**  **42% (64/151)** | **Obesity**  **38%(57/151)** | ***P*-value2,3** | **F-statistic4** |
| **Systolic BP (mmHg)** | 111±11 | 115±13 | 117±14 | 0.073 | 2.66 |
| **Diastolic BP (mmHg)** | 70±9 | 70±11 | 73±10 | 0.303 | 1.21 |
| **0h glucose (mmol/L)** | 4.9±0.4 | 4.9±0.5 | 5.1±0.5 | 0.131 | 2.06 |
| **2h glucose (mmol/L)** | 6.7±1.8 | 7.3±1.5 | 7.5±2.2 | 0.127 | 2.09 |
| **A1C (%)** | 5.3±0.4 | 5.3±0.5 | 5.4±0.5 | 0.373 | 0.99 |
| **0h insulin (pmol/L)** | 35.4±13.8 | 46.8±23.4 | 56.4±30.0 | 0.001 b*** | 7.21 |
| **Diabetes** | 0% | 2% | 9% | 0.059 | N/A5 |
| **Matsuda Index** | 5.6±3.1 | 4.3±2.2 | 4.4±2.8 | 0.043b* | 3.23 |
| **Insulin Secret Index** | 0.5±0.3 | 0.6±0.3 | 0.6±0.3 | 0.370 | 1.00 |
| **Cholesterol (mmol/L)** | 4.3±0.8 | 4.3±0.8 | 4.5±0.9 | 0.473 | 0.75 |
| **Triglyceride (mmol/L)** | 0.7±0.4 | 0.7±0.3 | 0.8±0.3 | 0.196 | 1.65 |
| **HDL-chol (mmol/L)** | 1.7±0.5 | 1.5±0.3 | 1.5±0.4 | 0.006 a*, b** | 5.31 |
| **LDL-chol (mmol/L)** | 2.4±0.8 | 2.6±0.7 | 2.7±0.8 | 0.100 | 2.34 |
| **LDL Particle Size (nm)** | 21.2±0.5 | 21.1±0.5 | 21.0±0.5 | 0.283 | 1.27 |
| **LDL Part No. (nmol/L)** | 860±294 | 1020±357 | 1161±389 | 0.001 b** | 7.16 |
| **hsCRP (mg/L)** | 1.7±2.3 | 2.3±2.7 | 4.3±5.8 | 0.006 b*, c* | 5.23 |
| **Fibrinogen (g/L)** | 3.0±0.1 | 3.2±0.6 | 3.4±0.6 | 0.036 b* | 3.39 |
| **Men (n=229)** | | | | | |
| **Parameter** | **Nl Weight**  **32%**  **(72/229)** | **Overweight**  **49% (113/229)** | **Obesity**  **19%**  **(43/229)** | ***P*-value2,3** |  |
| **Systolic BP (mmHg)** | 117±13 | 123±13 | 126±15 | 0.001 a*b** | 7.12 |
| **Diastolic BP (mmHg)** | 73±11 | 75±10 | 78±10 | 0.042 b* | 3.21 |
| **0h glucose (mmol/L)** | 5.0±0.5 | 5.2±0.6 | 5.7±1.6 | <0.001 b***c** | 10.41 |
| **2h glucose (mmol/L)** | 7.1±1.9 | 7.4±2.4 | 9.0±3.5 | <0.001 b***c** | 9.07 |
| **A1C** | 5.3±0.5 | 5.4±0.5 | 5.8±1.2 | 0.001 b***c* | 6.74 |
| **0h insulin (pmol/L)** | 30.0±18.0 | 46.8±27.0 | 80.4±45.0 | <0.001 a***b***c*** | 39.95 |
| **Diabetes** | 4% | 9% | 19% | 0.034 | N/A |
| **Matsuda Index** | 6.6±4.1 | 4.7±2.6 | 2.8±1.7 | <0.001 a***b***c** | 22.52 |
| **Insulin Secret Index** | 0.4±0.3 | 0.6±0.4 | 0.8±0.6 | <0.001 b*** c* | 9.58 |
| **Cholesterol (mmol/L)** | 4.2±0.9 | 4.4±0.9 | 4.4±1.0 | 0.162 | 1.83 |
| **Triglyceride (mmol/L)** | 0.8±0.3 | 0.9±0.4 | 1.2±0.7 | <0.001 b*** c** | 1.65 |
| **HDL-chol (mmol/L)** | 1.3±0.4 | 1.2±0.3 | 1.2±0.3 | 0.008 a* b* | 4.95 |
| **LDL-chol (mmol/L)** | 2.5±29 | 2.8±0.9 | 2.7±0.9 | 0.025 a* | 2.34 |
| **LDL Particle Size (nm)** | 20.9±0.6 | 20.8±0.6 | 20.6±0.6 | 0.117 | 2.17 |
| **LDL Part No. (nmol/L)** | 1011±383 | 1183±423 | 1176±435 | 0.016 a* | 4.19 |
| **hsCRP (mg/L)** | 1.1±1.8 | 1.3±2.0 | 2.9±2.8 | <0.001 b*** c*** | 11.66 |
| **Fibrinogen (g/L)** | 2.5±0.7 | 2.6±0.5 | 2.9±0.6 | <0.001 b*** c** | 7.96 |

1Metabolic testing done in the 380 participants who proceed to Visit 2. No enrollees were underweight. 2Comparision by One-way ANOVA **3**One-way ANOVA notation: **a**: difference between Normal Weight & Overweight, b: difference Normal Weight & Obesity, c: difference between Overweight & Obesity *<0.05, **<0.01, ***<0.001 4Provided for continuous variables (Degrees of Freedom=2) 5Not applicable


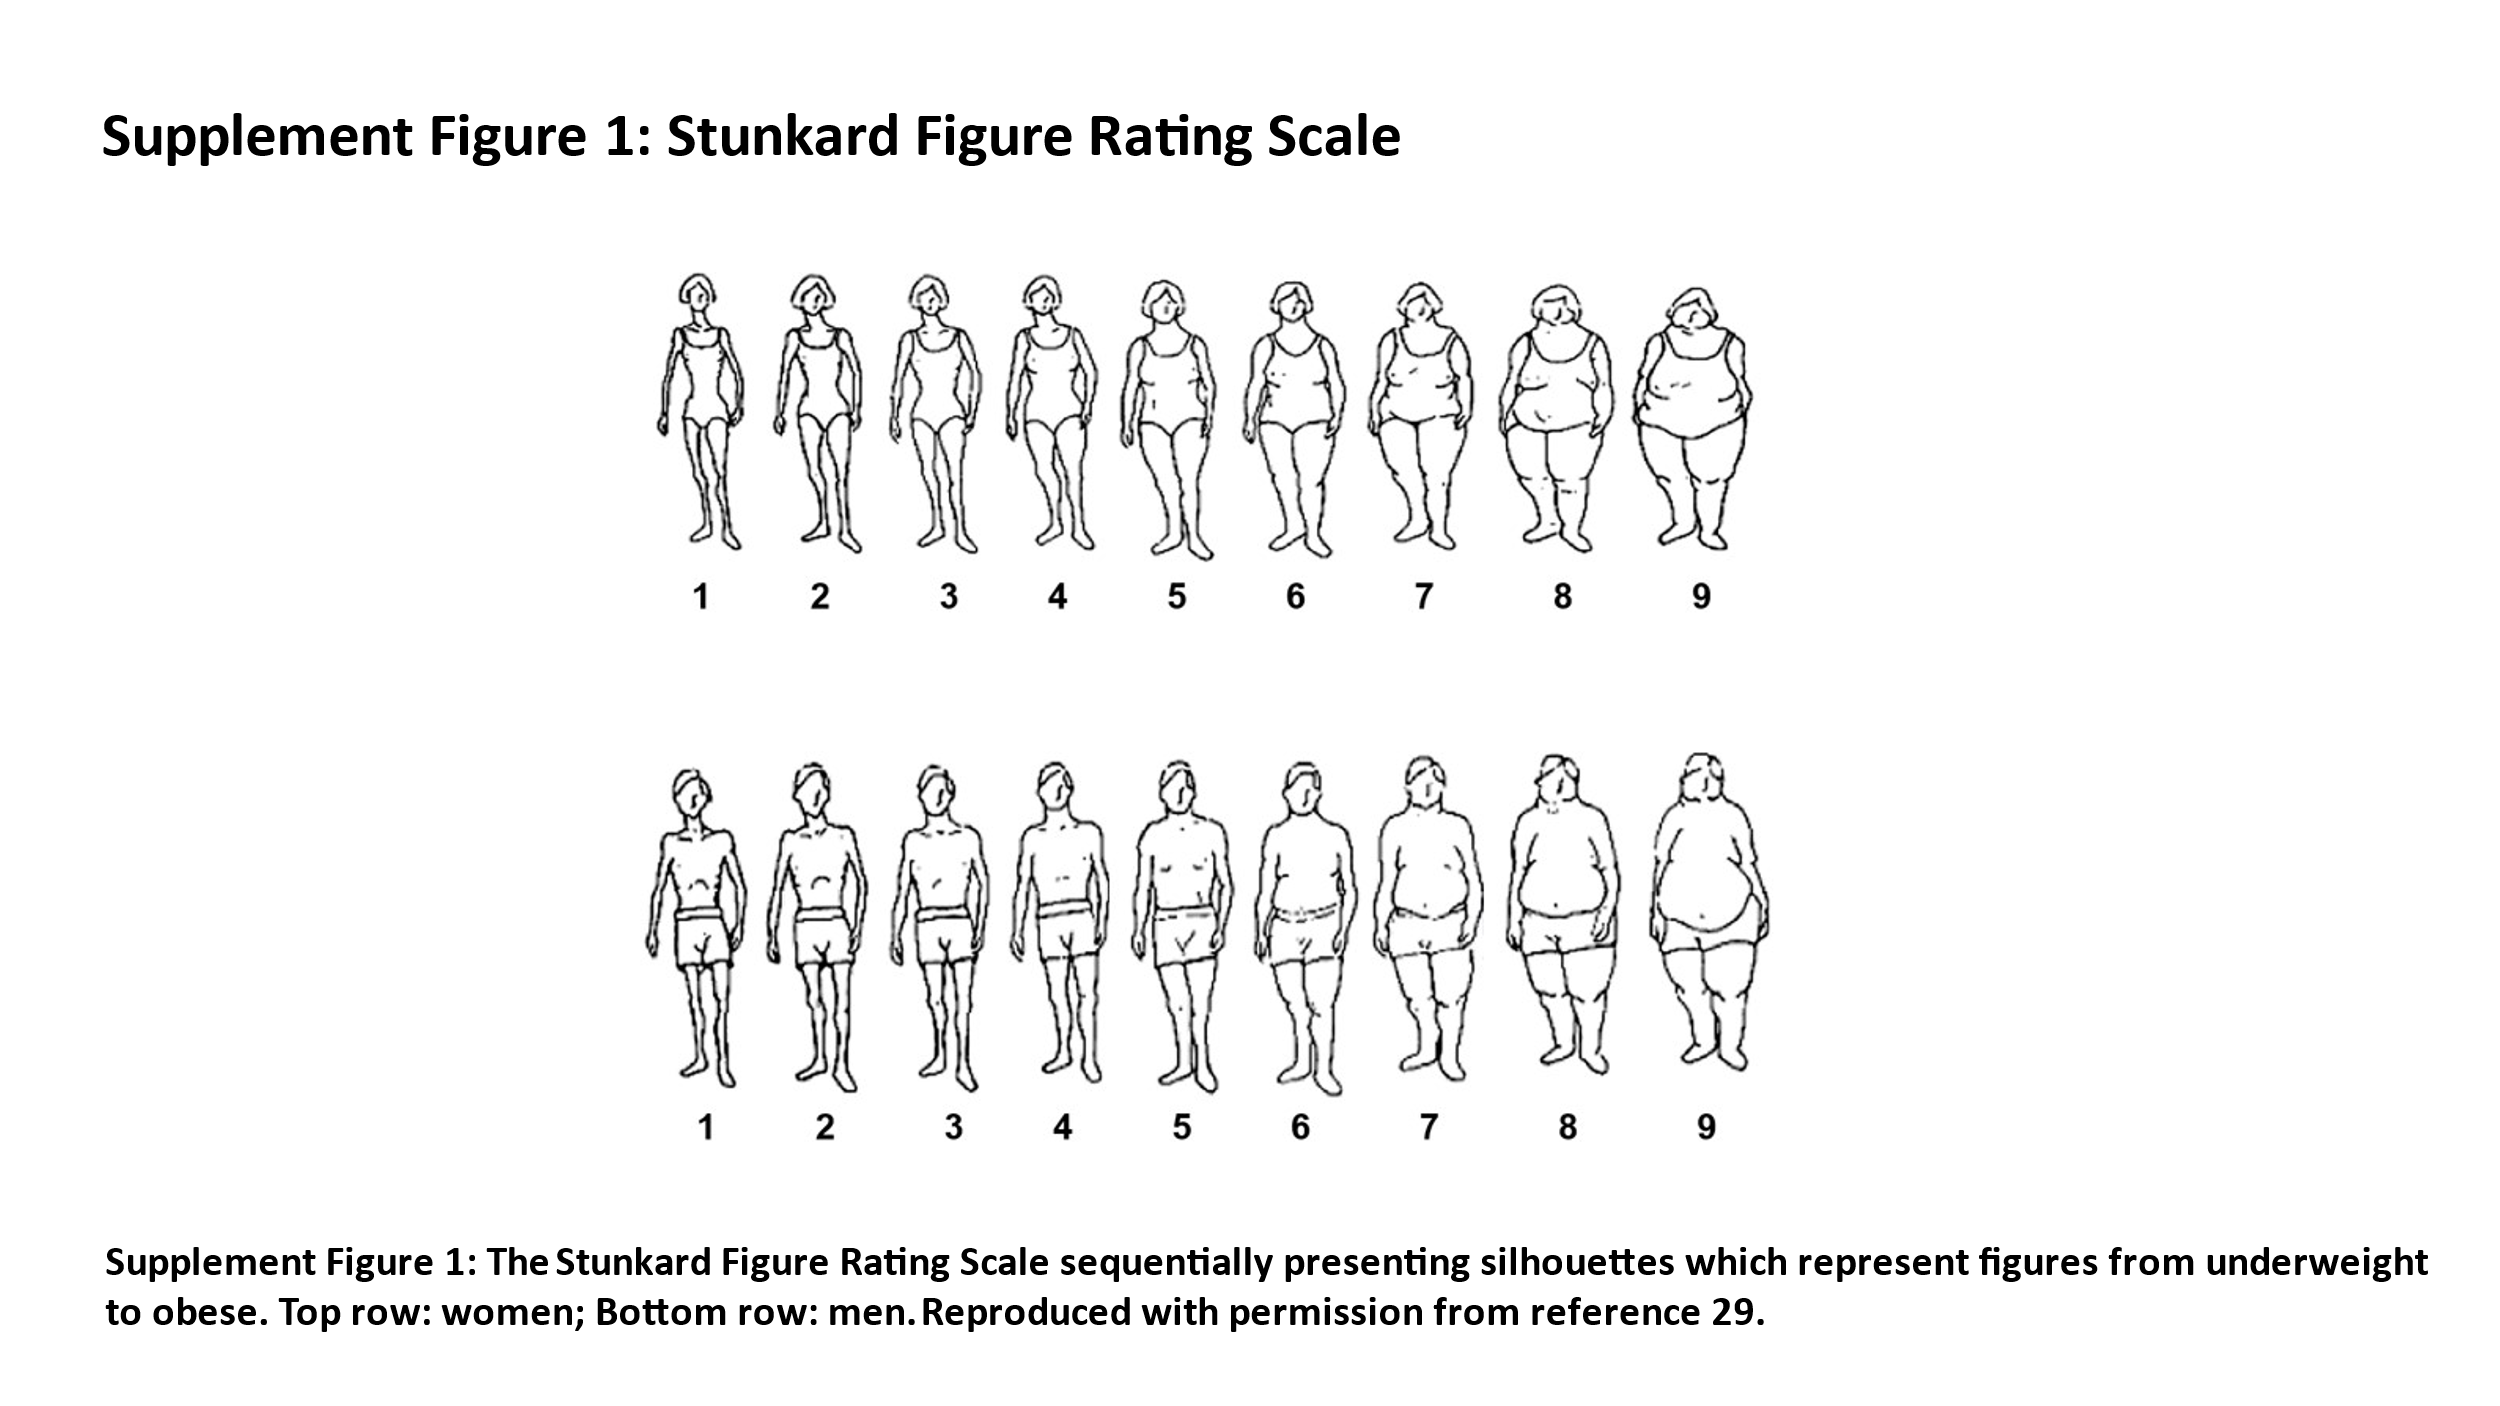


**Note**: Supplement Figure 1 reproduced with permission from Stunkard AJST, Schulsinger F. Use of the Danish Adoption Register for the study of obesity and thiness. In: Kety S, editor. The Genetics of Neurological and Psychiatric Disorders. New York, NY: Raven Press; 1983:115–120.29
